# Supplementary material for: Spectrally blue hydrated parent body of asteroid (162173) Ryugu
Source: PubMed Central journal article supplement (PMC8492871; doi:10.1038/s41467-021-26071-8), 2021-10-05
Supplement: 41467_2021_26071_MOESM1_ESM.pdf [file 41467_2021_26071_MOESM1_ESM.pdf]

## SUPPLEMENTARY INFORMATION

### Spectrally blue hydrated parent body of asteroid (162173) Ryugu

Eri Tatsumi, Naoya Sakatani, Lucie Riu, Moe Matsuoka, Rie Honda, Tomokatsu Morota, Shingo Kameda, Tomoki Nakamura, Michael Zolensky, Rosario Brunetto, Takahiro Hiroi, Sho Sasaki, Sei'ichiro Watanabe, Satoshi Tanaka, Jun Takita, Cédric Pilorget, Julia de León, Marcel Popescu, Juan Luis Rizo García, Javier Licandro, Ernesto Palomba, Deborah Domingue, Faith Vilas, Humberto Campins, Yuichiro Cho, Kazuo Yoshioka, Hirotaka Sawada, Yasuhiro Yokota, Masahiko Hayakawa, Manabu Yamada, Toru Kouyama, Hidehiko Suzuki, Chikatoshi Honda, Kazunori Ogawa, Kohei Kitazato, Naru Hirata, Naoyuki Hirata, Yuichi Tsuda, Makoto Yoshikawa, Takanao Saiki, Fuyuto Terui, Satoru Nakazawa, Yuto Takei, Hiroshi Takeuchi, Yukio Yamamoto, Tatsuaki Okada, Yuri Shimaki, Kei Shirai, Seiji Sugita

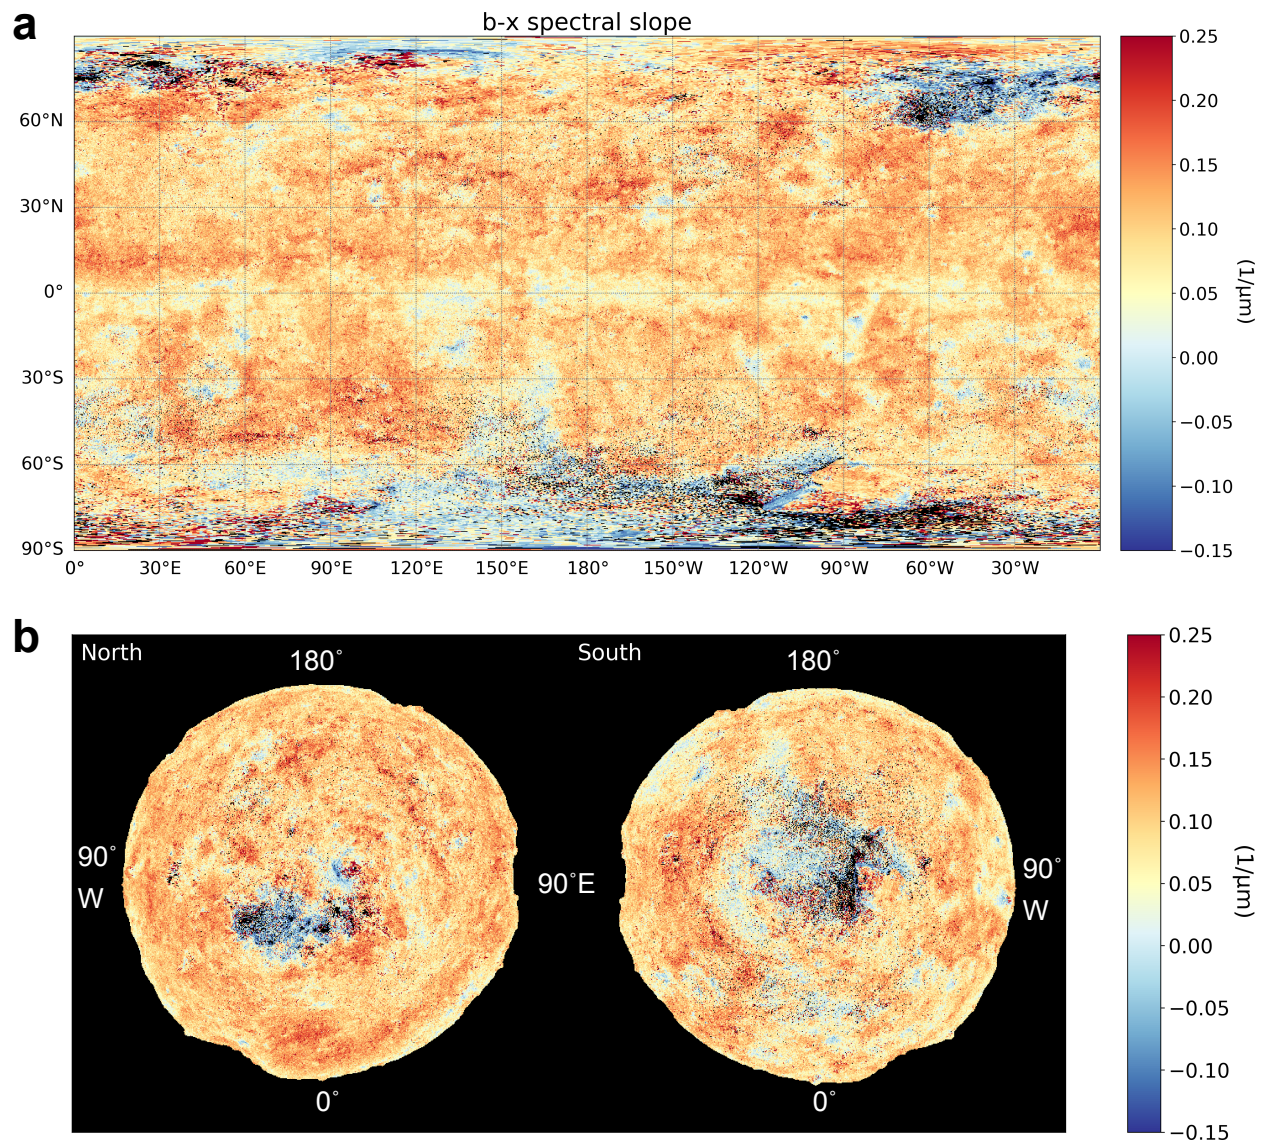

**Supplementary Figure 1. Global spectral slope (b-x: 0.48 – 0.86  $\mu\text{m}$ ) distribution.** The spectral slope [ $1/\mu\text{m}$ ] between 0.48 to 0.86  $\mu\text{m}$  was calculated by linear regression of normalized reflectance values at b (0.48  $\mu\text{m}$ ), w (0.70  $\mu\text{m}$ ), and x (0.86  $\mu\text{m}$ ) bands. **a** Cylindrical projection map. **b** Maps projected from the north and south poles.

**Supplementary Table 1. ONC-T Image ids used for this study.** All those images can be found in the archive page: [https://data.darts.isas.jaxa.jp/pub/hayabusa2/paper/Tatsumi\\_2021/](https://data.darts.isas.jaxa.jp/pub/hayabusa2/paper/Tatsumi_2021/).

| Item                    | Image id                                                    |
|-------------------------|-------------------------------------------------------------|
| Figures 1a, 6           | hyb2_onc_20190228_130608_tvf - hyb2_onc_20190228_130744_tuf |
| Figure 1b               | hyb2_onc_20191026_065643_tvf - hyb2_onc_20191026_065928_tuf |
| Figure 1c, 6            | hyb2_onc_20190301_060828_tvf - hyb2_onc_20190301_061004_tuf |
| Figure 1d               | hyb2_onc_20190301_115158_tvf - hyb2_onc_20190301_115334_tuf |
| Supplementary Figure 4a | hyb2_onc_20191036_065652_tvf                                |
| Supplementary Figure 4b | hyb2_onc_20190301_060828_tvf                                |
| Supplementary Figure 4c | hyb2_onc_20190301_115158_tvf                                |
| Supplementary Figure 4d | hyb2_onc_20190228_130608_tvf                                |
| Supplementary Movie 1   | hyb2_onc_20190228_130608_tvf - hyb2_onc_20190228_181304_tuf |
| Supplementary Movie 2   | hyb2_onc_20190301_060828_tvf - hyb2_onc_20190301_130955_tuf |

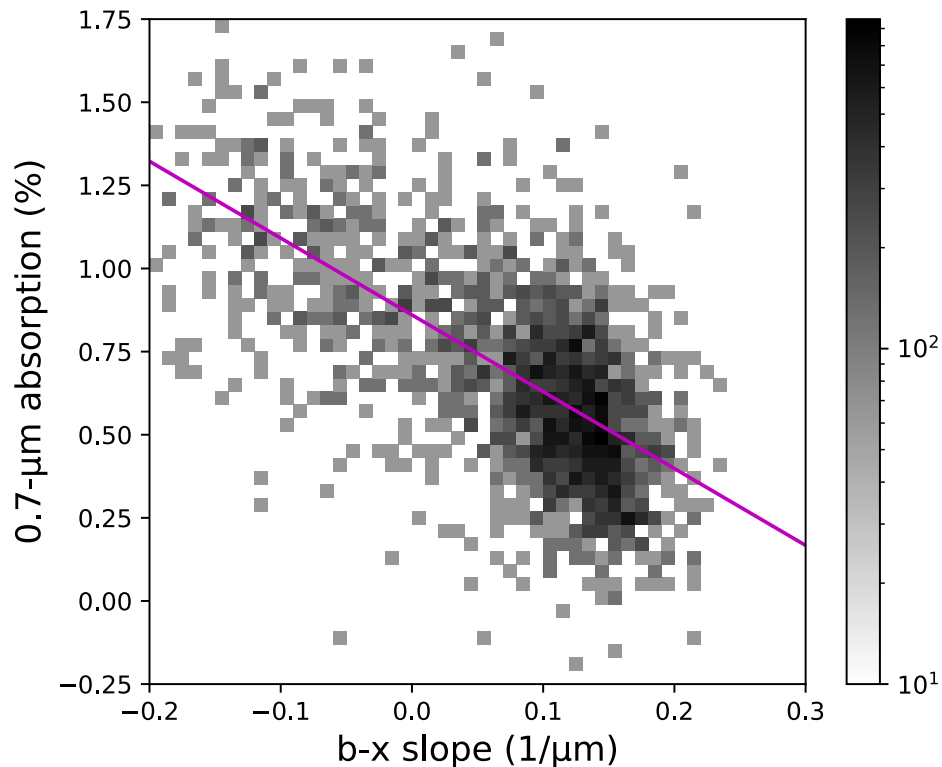

**Supplementary Figure 2. Dependence of 0.7-μm band absorption to the b-x (480 – 860 nm) slope.** Spectral slope and 0.7-μm band absorption at the north polar region, i.e., the data from central 394 x 394 pixels of Fig. 1a. Density plot indicates pixel numbers and the violet line indicates the linear regression (correlation coefficient -0.65). The color bar indicates the number of pixels in each bin.

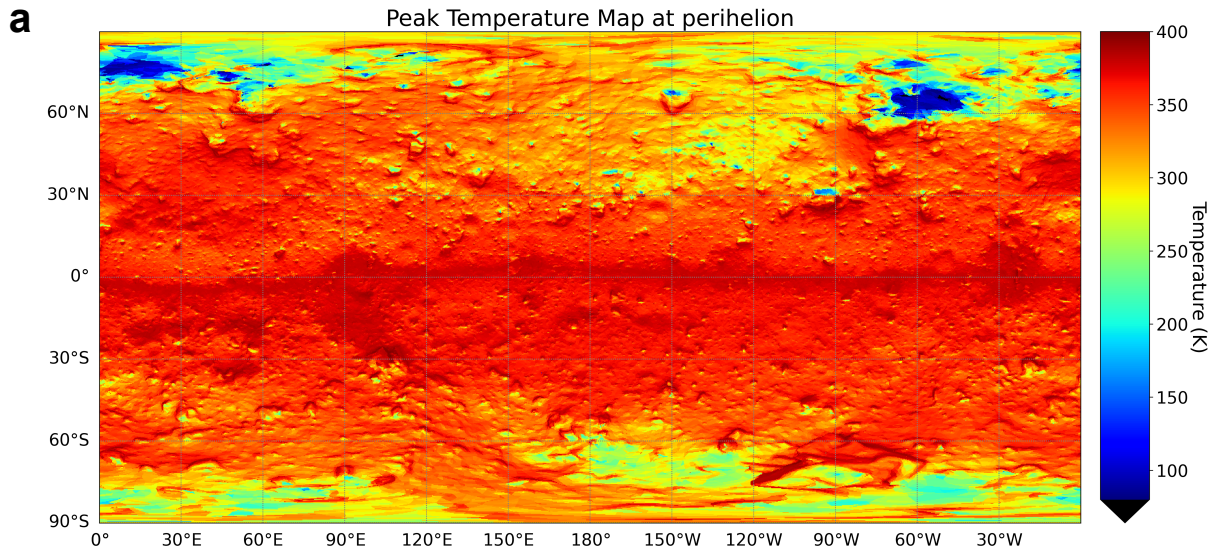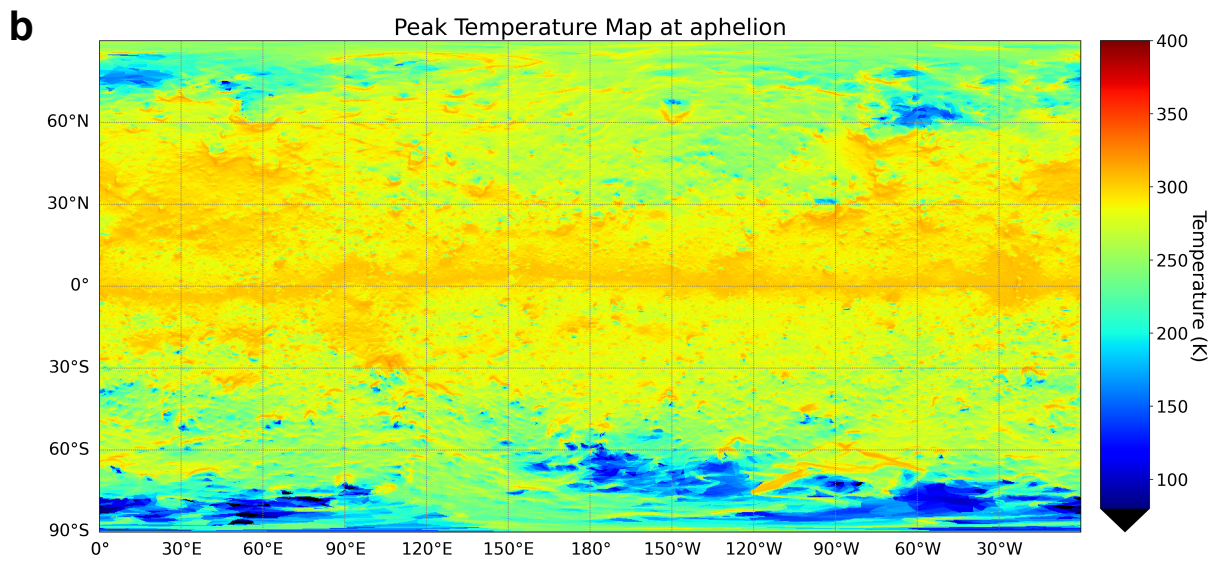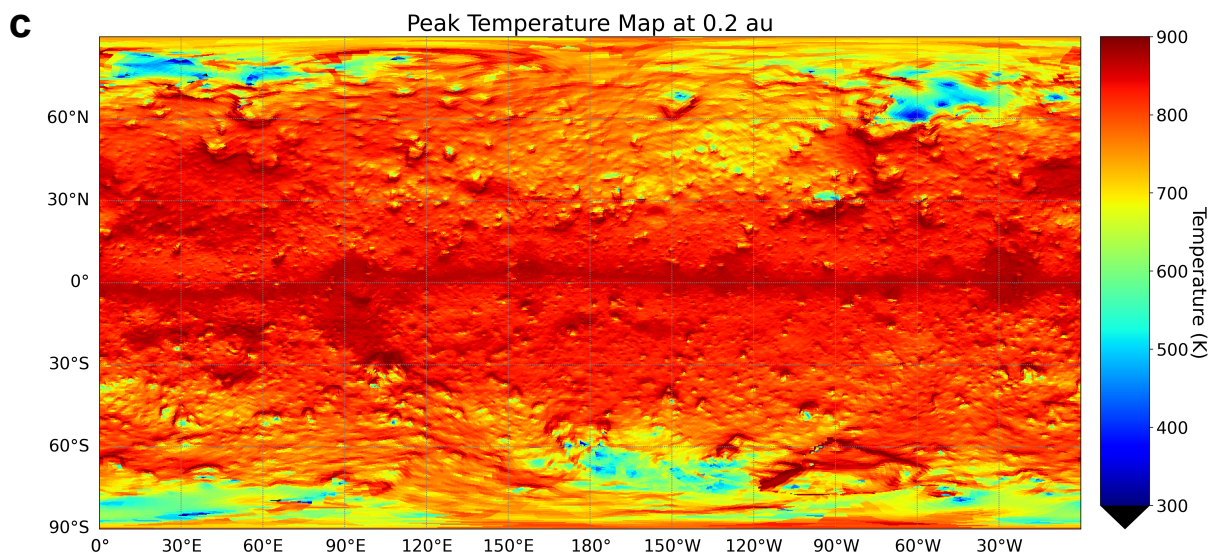

**Supplementary Figure 3. Simulated global peak temperature map.** Diurnal maximum surface temperature is calculated based on the shape model and the current pole orientation. **a** Temperature distribution at the current orbit at perihelion. **b** Temperature at the current orbit at aphelion. **c** Temperature distribution at the heliocentric distance of 0.2 au at equinox. Most of the surface exceeds 700 K where the phyllosilicates start to be decomposed, while some regions around poles are kept under 700 K. If Ryugu had experienced close encounter to the Sun which was hypothesized in [1], there could be a large difference in phyllosilicate amount between polar regions and the typical Ryugu surface. Nevertheless, such a large difference was not observed (See Fig. 3).

**Supplementary Table 2. Summary of the NIRS3 dataset used for the characterization of the polar regions.** The number of spectra indicates the number of NIRS3 spectra that fall into the region of interest and that were used to compute the average spectra displayed on Fig. 3. The spectra on the region of interest were extracted based on simultaneous observations of the ONC and NIRS3 instrument as explained in [2]. The comments describe some notes for observation, e.g., photometry correction [3] and Radiometric Calibration Coefficient (RCC) [4].

| Observation                    | Region     | Phase                           | Number of spectra | Comments                 |
|--------------------------------|------------|---------------------------------|-------------------|--------------------------|
| 27 <sup>th</sup> February 2019 | Otohime A  | After 1 <sup>st</sup> Touchdown | 23                | No photometry correction |
| 26 <sup>th</sup> July 2019     | North Pole | After 2 <sup>nd</sup> Touchdown | 75                | Change of RCC            |
| 27 <sup>th</sup> July 2019     | Otohime B  | After 2 <sup>nd</sup> Touchdown | 30                | Change of RCC            |
| 26 <sup>th</sup> October 2019  | Otohime C  | After 2 <sup>nd</sup> Touchdown | 100               | Change of RCC            |

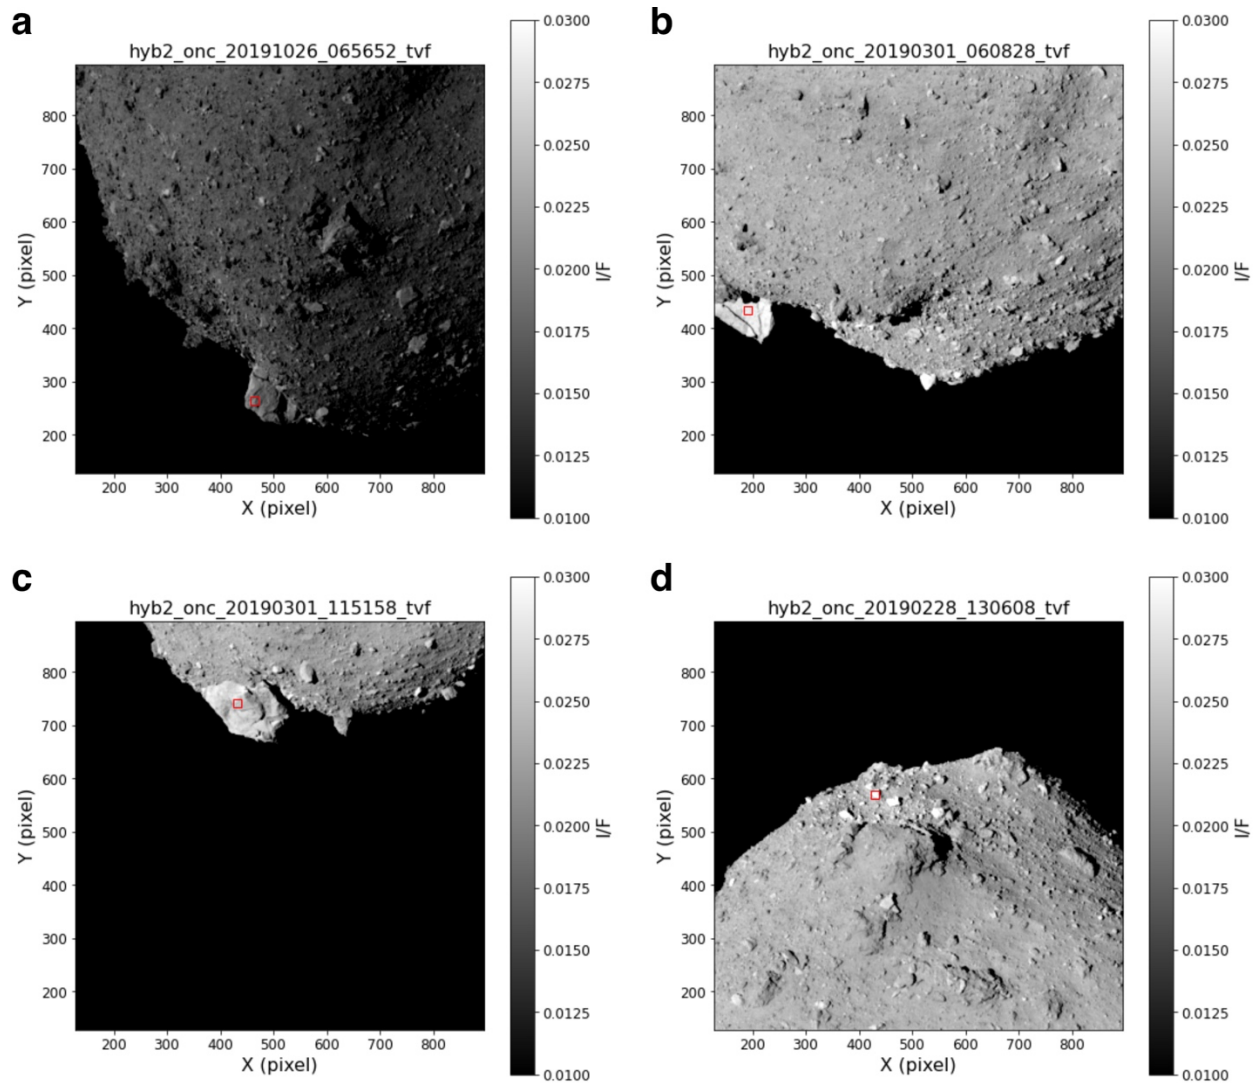

**Supplementary Figure 4. Regions of interest for extracting spectra in Fig. 2.** Each red square (15 pixels by 15 pixels) indicates the region of interest. **a** Otohime Facet A. **b** Otohime Facet B. **c** Otohime Facet C. **d** the north pole region. X and Y axes indicate pixel position in each image. The color bars indicate radiance factor (I/F) values (no unit). Image ids can be found in Supplementary Table 1.

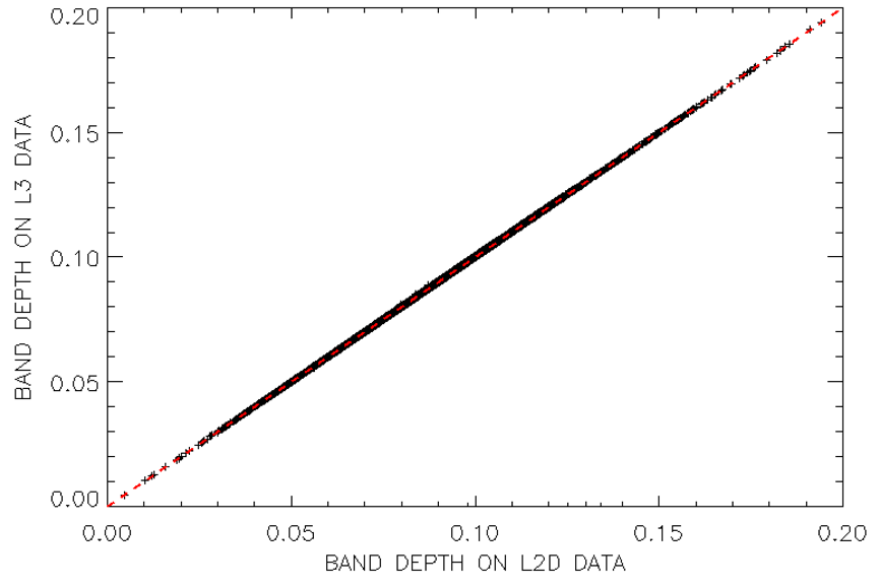

**Supplementary Figure 5. Band depth measurement at 2.72  $\mu\text{m}$ .** Correlation of band depth at 2.72  $\mu\text{m}$  measured from I/F data (L2D) and photometrically corrected data (L3), showing the band depth can be measured from I/F data without photometry correction. L2D data are available as the calibrated data on the Small Bodies Node of the NASA Planetary Data System (<https://sbn.psi.edu/pds/resource/hayabusa2/nirs3.html>). The photometry correction applied to L3 can be found in [3]. The red dashed line shows the line  $x=y$ .

### Supplementary references

- [1] Morota, T., et al. Sample collection from asteroid (162173) Ryugu by Hayabusa2: Implications for surface evolution. *Science* **368**, 654-659 (2020).
- [2] Kitazato, K., et al. Thermally altered subsurface material of asteroid (162173) Ryugu. *Nature Astronomy* **5**, 246-250 (2021).
- [3] Piloget, C., et al. Global-scale albedo and spectrophotometric properties of Ryugu from NIRS3/Hayabusa2, implications for the composition of Ryugu and representativity of the returned samples. *Icarus* **355**, 114126 (2021)
- [4] Kitazato, K., et al. The surface composition of asteroid 162173 Ryugu from Hayabusa2 near-infrared spectroscopy. *Science* **364**, 272-275.
